# Can ChatGPT-4o really pass medical science exams? A pragmatic analysis using novel questions.

Philip M. Newton\*, Christopher J. Summers, Uzman Zaheer, Maira Xiromeriti, Jemima R. Stokes, Jaskaran Singh Bhangu, Elis G. Roome, Alanna Roberts-Phillips, Darius Mazaheri-Asadi, Cameron D. Jones, Stuart Hughes, Dominic Gilbert, Ewan Jones, Keioni Essex, Emily C. Ellis, Ross Davey, Adrienne A. Cox and Jessica A. Bassett.

Swansea University Medical School, Swansea, Wales, United Kingdom, SA2 8PP.

## \*Correspondence:

Corresponding Author; [p.newton@swansea.ac.uk](mailto:p.newton@swansea.ac.uk)

## ORCID IDs:

- PMN <https://orcid.org/0000-0002-5272-7979>
- CJS <https://orcid.org/0009-0000-5336-2492>
- UZ <https://orcid.org/0009-0008-2148-1532>
- MX <https://orcid.org/0000-0002-2975-184X>
- JRS <https://orcid.org/0000-0003-2623-0245>
- EGR <https://orcid.org/0009-0009-5845-4164>
- DMA <https://orcid.org/0009-0002-7999-3123>
- ECE <https://orcid.org/0009-0005-6493-9337>
- RD <https://orcid.org/0000-0001-9852-1653>
- DG <https://orcid.org/0009-0002-0024-3662>
- EJ <https://orcid.org/0009-0002-9221-1990>
- JAB <https://orcid.org/0009-0002-2146-2987>
- AAC <https://orcid.org/0000-0002-3902-3491>

**Keywords:** assessment validity, academic integrity, cheating, evidence-based education, MCQs, pragmatism

## 25    **Abstract**

26    ChatGPT apparently shows excellent performance on high level professional exams such as those  
 27    involved in medical assessment and licensing. This has raised concerns that ChatGPT could be used  
 28    for academic misconduct, especially in unproctored online exams. However, ChatGPT has also  
 29    shown weaker performance on questions with pictures, and there have been concerns that ChatGPT's  
 30    performance may be artificially inflated by the public nature of the sample questions tested, meaning  
 31    they likely formed part of the training materials for ChatGPT. This led to suggestions that cheating  
 32    could be mitigated by using novel questions for every sitting of an exam and making extensive use of  
 33    picture-based questions. These approaches remain untested.

34    Here we tested the performance of ChatGPT-4o on existing medical licensing exams in the UK and  
 35    USA, and on novel questions based on those exams.

36    ChatGPT-4o scored 94% on the United Kingdom Medical Licensing Exam Applied Knowledge Test,  
 37    and 89.9% on the United States Medical Licensing Exam Step 1. Performance was not diminished  
 38    when the questions were rewritten into novel versions, or on completely novel questions which were  
 39    not based on any existing questions. ChatGPT did show a slightly reduced performance on questions  
 40    containing images, particularly when the answer options were added to an image as text labels.

41    These data demonstrate that the performance of ChatGPT continues to improve and that online  
 42    unproctored exams are an invalid form of assessment of the foundational knowledge needed for  
 43    higher order learning.

44

## 45 Introduction

46 New generative artificial intelligence (AI) tools such as ChatGPT have attracted enormous attention,  
 47 in part for their apparent ability to pass high level professional exams, with the subscription version  
 48 of ChatGPT, running GPT-4, scoring an average of 75% on MCQ-based exams across a variety of  
 49 disciplines (1). This excellent performance is replicated on specific medical qualifying exams such as  
 50 the United States Medical Licensing Exam (USMLE) Step 1 where it scored 86% (2) and the United  
 51 Kingdom Medical Licensing Exam Applied Knowledge Test (UK MLA AKT) where it scored 76.3%  
 52 (3). These exams test high level problem-solving, requiring the application of core knowledge to  
 53 clinical scenarios (4) and represent a broader principle wherein multiple choice questions can, if  
 54 written appropriately, assess higher-order learning in a range of disciplines (5).

55 However there have been a number of responses and criticisms of the claim that ChatGPT is  
 56 genuinely solving the problems presented in these questions, in part because this seems to lead  
 57 logically onto the idea that ChatGPT is able to ‘reason’ which apparently it cannot (6). Instead, critics  
 58 propose, tools like ChatGPT are more likely ‘regurgitating’ content which has been in their training  
 59 materials (7), a proposal which is supported by the fact that many studies use sample papers which  
 60 are in the public domain and have been for some time. For instance, the USMLE sample paper cited  
 61 above was published in 2021. This regurgitation is not proposed to be verbatim, but instead is,  
 62 essentially, a paraphrasing of prior training materials in a way that resembles a student who is  
 63 plagiarising a piece of text by changing key words but without understanding the meaning, and so  
 64 occasionally getting things (very) wrong (8). Thus, the argument goes, part of the reason why LLMs  
 65 can ‘pass’ exams is because of this ‘regurgitation’ of sample papers which have been in the public  
 66 domain for some time, and so to counter the apparent threat of ChatGPT to exam security and  
 67 integrity educators could use novel questions for each sitting of the exam (9). In addition, there have  
 68 been efforts to identify features of exam questions which ChatGPT might struggle with, for example  
 69 an increase in the number of answer items, increasing language complexity or having multiple correct  
 70 answers. However none of these appears to have any effect on the numbers of questions which  
 71 ChatGPT can answer correctly (10).

72 Many early papers which tested the performance of ChatGPT on sample exams deliberately excluded  
 73 questions containing images, on the basis that older versions of ChatGPT, even GPT-4, could not  
 74 process these images. Thus, the reported performance of ChatGPT may be an over-estimation, since  
 75 the percentage scored by ChatGPT uses a lower denominator once image-based questions are  
 76 excluded (e.g. (11)). This also leads to proposals that educators could author ‘ChatGPT-proof’  
 77 questions by including images, along with mathematical calculations and reasoning tests, which it is  
 78 proposed that ChatGPT does not perform well at (6).

79 These issues are important in part because of wider questions about the security, but also the  
 80 inclusivity and cost, of examinations. In particular the sorts of university-administered knowledge  
 81 tests that form part of a STEM curriculum prior to assessment using formal licensing examinations.  
 82 Online examinations are cheaper and more flexible than their in-person equivalents, but they  
 83 potentially increase the risk of cheating. During the COVID-19 pandemic, the percentage of students  
 84 who admitted to cheating in online exams appeared to double, and more students reported cheating  
 85 than not (12). One apparent solution to this problem is to increase the use of online  
 86 proctoring/invigilation systems to monitor student behaviour. However, these then drive back up the  
 87 cost of the online exams, and the student experience of remote proctoring is poor, with concerns  
 88 about privacy, fairness, inclusivity and cost (13,14). An alternative is to avoid the use of proctoring  
 89 altogether. A high profile 2023 publication analysed exam performance data from the COVID

lockdown and concluded that unproctored online exams are a ‘valid and meaningful’ way of measuring student learning (15), although this analysis has been challenged (16) and does not include a consideration of ChatGPT. Thus it is important to understand whether ChatGPT truly can pass exams, including novel questions with images, as part of a consideration about how best to deploy exams, online or in-person, proctored or not.

Pragmatism is a research paradigm which prioritises the asking of questions whose answers will be useful, rather than perhaps asking more academic or basic questions (17). If ChatGPT truly can pass high level STEM exams, even with novel questions containing images, then from a pragmatic standpoint this is important because it essentially settles any debate about whether these examinations can be conducted in an online, unproctored format. From the pragmatic perspective, it does not matter *how* ChatGPT is doing this, either by truly solving problems or through some sophisticated paraphrasing. There is a related pragmatic issue, which is that for most STEM subjects there is a core curriculum; a basic set of knowledge and skills which graduates must be able to demonstrate in order to graduate, and also to be able to apply knowledge to practice. This cumulative view of learning has a long history and remains prevalent today through the use of instruments such as Bloom’s Taxonomy (18). In essence, we cannot expect students to undertake learning and practice at the higher levels of Blooms Taxonomy unless they have the core foundational knowledge to be applied to those higher levels. Thus educators need to assess that foundational knowledge first, before it is applied, particularly where there are safety concerns, e.g. for patients. However, it seems reasonable to propose that there are only so many ways that one can phrase any exam questions which might assess these core principles. This then creates a risk that, if educators strive to write completely novel questions on every core topic for every exam sitting, just to thwart ChatGPT, then this will rapidly become impossible. These issues also have relevance for the proposed positive benefits of ChatGPT. It offers great promise as a tutoring tool for students who are preparing for exams (19) but educators and learners both need to be confident that the answers given are logical and reasonable (20).

Some of the controversy and discourse about the apparent ability of ChatGPT to pass and perform well (or not) on exams likely comes from the frequent updating of ChatGPT over a short timescale. A review of ChatGPT’s performance on exams from multiple disciplines found that the subscription version of ChatGPT, running GPT-4, outperformed the free version running GPT-3 or 3.5, with the average difference being 25 percentage points (1). On May 13 2024 OpenAI, the creators of ChatGPT, released another update, entitled ChatGPT-4o, showing enhanced performance compared to GPT-4, particularly on the integration of text, visual and audio information (21). The performance of ChatGPT-4o on medical licensing exams has not yet been examined.

Here then we address the following research questions. It is important to be clear that the specific medical licensing-type exams tested here are intended to be a model for STEM exams generally, given that they are written to a high standard and are aimed at problem-solving and the application of knowledge (4,5).

1. How well does ChatGPT-4o perform on sample medical licensing exams in the USA and UK?
2. Is the performance of ChatGPT affected when these sample questions are rewritten into novel formats, but assessing the same core curricular concepts?
3. How well does ChatGPT perform on completely novel medical-licensing type questions?

134

135

## Methods

The following question sources were tested.

1. (Pilot) Wikiversity Fundamentals of Neuroscience Exam (22)
2. Sample paper 1, UK Medical Licensing Assessment Applied Knowledge Test (23)
3. USMLE Step 1 Sample paper (24)
4. Rewritten questions from 2+3
5. Completely Novel USMLE-style questions.

***Rewriting of existing questions in the public domain.*** Each question from sources 1-3 was rewritten by a member of the research team. Each question was rewritten three times with each rewrite undertaken by a different team member. Rewriting instructions were to create an original question, but which assessed the same learning, specifically to ‘change as much as possible about the question without changing the underlying learning. Change all the text where possible’. Suggestions of specific items to change included demographic details in the scenarios, answer options and answer order. Each team member was also provided with a summary of common issues found when writing USMLE-style questions (4) and asked to avoid any of the identified writing flaws. All rewritten items were checked for accuracy and originality by registered doctors (CS, RD) or a subject matter expert (PMN) and adjusted where necessary, for example if the revised question could be made even more different to the original question.

An initial pilot was undertaken using five questions on neuroscience from the ‘Wikiversity’ website. These were considered ‘lower order’ questions, assessing basic factual knowledge of neurological disease. The questions have been in the public domain since 2013. Each question was rewritten into three different forms by a member of the research team, who then discussed the process and feasibility of scaling the methodology to a larger exam. All four versions of each question were then pilot tested using GPT-4 on 23/04/24 and 24/04/24.

***Analysis of existing medical licensing exams and rewrites.*** Each question was tested using a single shot method in a way that would be expected to be the most likely approach taken by a student who was seeking to cheat on an MCQ exam, i.e. the text was highlighted in the pdf (original questions) or word document (rewrites), copied and then pasted directly into ChatGPT-4o with no attempt to format the text. Where the question included a picture, this was copied using screen clipping, saved and uploaded as a .png file with only the country and the question number as the file name (e.g. ‘UK32’). No additional prompts were given apart from the content of the question. Each question was asked in a new chat and no memory functions were activated. For the USMLE questions, a ‘temporary chat’ was activated for each question. No responses were given to ChatGPT. ChatGPT’s first response was recorded each time as correct/incorrect. ChatGPT-4o tests were undertaken May 14-24 2024.

***Creation and analysis of novel questions.*** Two sets of completely novel questions were generated, totalling 90 questions in all. A first set of forty novel questions were created in the style of questions for the UK MLA AKT and USMLE, by an author who is experienced in the creation of these assessment items (CS), according to guidance from the United States National Board of Medical Examiners (4). Ten of these questions included novel images that were either created for this study or were images from the private collection of one of the authors (CS). None of these images are available in the public domain. All images were obtained with appropriate consent and anonymised prior to use in keeping with paragraph 10 of the General Medical Council’s professional standards on

making and using visual recordings of patients (25). These questions were mapped to curricula items from the MLA content map (26) and were of a comparative style and difficulty to the MLA. A second set of questions was written by an author (PMN) using guidance for the creation of multiple-choice questions which assess higher order learning in STEM. These guidelines include identifying assumed knowledge, creating problem-solving scenarios and the use of actions as answer options (5). Some of these questions included images sourced from Wikimedia Commons. During this process the authors observed a trend that ChatGPT appeared to struggle with anatomical images that had novel text labels, e.g. a brain section with the labels A-H added, with arrows to specific brain regions that corresponded to question answers. To probe this further, an additional set of questions was generated so that there was a total of 14 pairs of questions which assessed the same learning but either using a labelled image, or text equivalent. Finally, ChatGPT was then asked simply to identify the labels on the images from these questions where possible. Each question was asked in a new 'temporary chat'. ChatGPT-4o tests were undertaken May 24-Jun 18 2024.

192



## Results

**Summary.** We tested a total of 705 assessment items, of which ChatGPT answered 635 (90%) correctly. 111 of these questions contained images, of which ChatGPT answered 76 (68.5%) correctly. A breakdown of these items is below.

**Wikiversity Pilot.** GPT-4 correctly answered all versions of all questions, both the originals and the rewritten versions.

**United Kingdom Medical Licensing Assessment, Applied Knowledge Test.** ChatGPT-4o answered 94 of 100 questions on the original sample paper. Five of the questions included pictures. ChatGPT answered four of these correctly. ChatGPT then scored 93%, 91% and 95% on the three collections of rewrites. One question, on herpes zoster ophthalmicus, was answered incorrectly on all four occasions. In all other cases there was no consistent pattern. Some questions that ChatGPT had answered incorrectly on the original sample paper were answered correctly once rewritten, but the converse was also true for other questions. 85% of questions were answered correctly in all four versions (original and all three rewrites). The full dataset and questions are in Supplementary Data S1.

**United States Medical Licensing Exam Step 1.** ChatGPT-4o scored 89.9% (107/119) of the original questions correctly. Of the original 119, there were images in 23 of them, of which 16 (69.6%) were answered correctly. This suggested that ChatGPT might struggle more with the picture questions in this exam. Given that ChatGPT-4o had already demonstrated no impairment of performance when rewriting text questions from the UK MLA AKT into a novel format, we decided to rewrite only a sample of 27 of the USMLE questions, but to probe further this possible diminished performance on questions containing pictures by including 13 picture questions, of which 5 had been answered incorrectly from the original paper. Of the sample of 27, ChatGPT scored 74.1% (20/27) on the original versions, and then 85.2 (23/27), 70.4% (19/27) and 85.2% (23/27) on the rewrites. Only one question was answered incorrectly in all four versions. This was a picture question based on a graph, while the other four picture questions which ChatGPT had answered incorrectly were then answered correctly at least once during the rewrites. 55.6% (15/27) of questions were answered correctly on all four occasions. The full dataset and questions are in Supplementary Data S1.

**Novel questions:** A total of 90 novel questions were generated, of which ChatGPT answered 75 correctly. 28 of these questions were in pairs (2x14) which assessed the same learning in each pair. One version of the question contained a labelled image where the labels were simple letters (A,B,C etc) and these were the answer options, for example the image was a picture of the brain with different regions labelled A-H. The paired question contained answer options in text form, for example the brain regions were listed as text. An example of this format is in Figure 1. ChatGPT answered 13/14 of the text version of these questions, but only 2/14 of the labelled image questions. A summary of the analysis is in Supplementary Data S1. The novel questions may be shared upon request but are not published here due to the images contained within.

**Identification of labels on images.** Ten of the labelled images were structured in a way that it was reasonable to upload them to ChatGPT-4o with the prompt ‘Can you identify all the labels (A-X) on the uploaded image?’ where ‘X’ was either E, F, G or H depending on the number of labels. Of a total of 66 labels across the 10 images, ChatGPT correctly labelled 25 items. For all 10 images ChatGPT correctly identified the main structure in the image (e.g. brain, kidney) but not the labelled subregions.





237  
238  
239  
240  
241  
242  
243  
244  
245  
246  
247  
248  
249  
250  
251  
252  
253  
254  
255  
256  
257  
258  
259  
260  
261  
262  
263  
264  
265  
266  
267  
268  
269  
270  
271  
272

**Common scenario** An elderly gentleman is rushed to hospital after being found on the floor at home. He appears to be able to breathe and his heartrate is elevated but stable. However he appears to be completely paralysed and does not respond when asked questions. His pupils are pinpoints. He does not blink when something goes near his eyes, but when a light is shone into his eyes, they move horizontally to follow the light.

**Text question** Damage to which structure in the brain is most likely to result in the above presentation?

- A. Primary Motor Cortex
- B. Hippocampus
- C. Cerebellum
- D. Nucelus Accumbens
- E. Globus Pallidus
- F. Substantia Nigra
- G. Pons
- H. Medulla

**Image Question** Which of the structures in the image is most likely to be damaged?

- A
- B
- C
- D
- E
- F
- G
- H

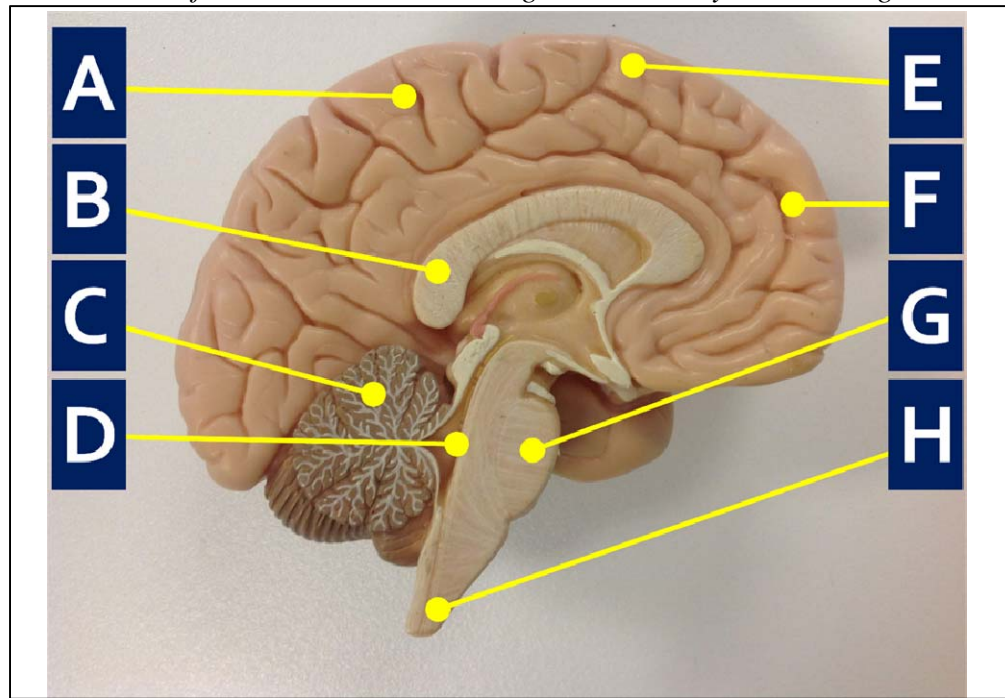

**Figure 1.** An example of a novel-higher order MCQ written using established guidelines (5), with text options as answers (which ChatGPT answers correctly), or a labelled image (which ChatGPT answers incorrectly). Note that the answer options do not correspond exactly.

## 273 Discussion

274 ChatGPT-4o showed a very high level of performance on the papers tested, even when the questions  
275 were rewritten so that they assessed the same learning but with different wording. This level of  
276 performance was also found on completely novel questions written in the style of professional  
277 licensing exams. Our analysis included many questions based on images, and almost all questions  
278 were designed to assess higher-order problem-solving (4,5).

279 A repeated finding from the research on academic misconduct demonstrates that one of the strongest  
280 factors contributing to an increased likelihood in the occurrence of academic dishonesty is the ease  
281 with which it can be committed (12,27). Cheating in online exams was already high before the  
282 emergence of ChatGPT (12) and our findings demonstrate that any student using ChatGPT would  
283 likely receive an excellent mark even if they had no prior knowledge whatsoever, further increasing  
284 any temptation to cheat. Thus it seems reasonable to propose that our findings mean online  
285 unproctored summative exams are now no longer a valid form of assessment, a conclusion which is  
286 in contrast to findings published following an analysis of exam performance during the COVID  
287 pandemic, but before the emergence of ChatGPT (15).

288 The high performance levels of ChatGPT may also increase the temptation to cheat using ChatGPT  
289 even in proctored exams, particularly if they are taken online; data suggest that proctoring  
290 considerably reduces cheating in online exams but does not eliminate it completely (12). We are not  
291 aware of any current data on the extent to which students are using ChatGPT to cheat in online  
292 exams, proctored or unproctored, although this is the subject of ongoing work. A study conducted in  
293 Vietnam in May 2023 showed that 23.7% of undergraduates cheated using ChatGPT, although the  
294 assessment formats were not specified (28). A study conducted at around the same time in US high  
295 schools found similar numbers in one school, though lower in two others (29). These figures seem  
296 likely to increase as ChatGPT becomes better known and more widely available, along with similar  
297 tools such as Claude.AI.

298 One intuitive response to these challenges is to design questions which ChatGPT finds harder to  
299 answer. This ‘arms race’ approach is partly the genesis of the current paper, based in part on earlier  
300 studies which observed that ChatGPT could not process image-based questions at all, and other  
301 studies suggesting that ChatGPT is a ‘copy and paste’ machine whose impact can be minimized by  
302 using novel questions for each sitting of an exam (9). We did find that ChatGPT struggled more on a  
303 very specific type of MCQ, where the answer items were single letter labels and arrows on images.  
304 There is more than one possible explanation for this apparent weakness. These questions are  
305 designed to require ‘assumed knowledge’ and so to be harder to answer than factual recall questions  
306 (5). For example, the picture item shown in figure 1 requires the test taker to know that the scenario  
307 represents the clinical condition Locked-In Syndrome, and then to know that this condition is  
308 associated with damage to the part of the brain called the pons, and then to be able to identify the  
309 anatomical location of the pons on a picture of a model. ChatGPT consistently struggled with these  
310 specific types of image questions and so one interpretation is that it is the ‘multi-step’ nature of these  
311 questions which trips up ChatGPT. However, ChatGPT was consistently correct on the text versions  
312 of these questions and would give detailed descriptions of the answer option. ChatGPT was also  
313 clearly able to identify, in text form, where the pons is located (for example). But when simply asked  
314 to identify the labels on these images ChatGPT struggled, indicating that it is the processing of these  
315 specific types of text-labelled images which ChatGPT struggles with, rather than the solving of  
316 multi-step problems.

One intuitive conclusion from these findings with images is that such questions could be used to thwart ChatGPT and so deter cheating in online exams. However, we caution against this interpretation. Writing an entire exam based on these types of questions seems implausible and unlikely to be valid. This limitation likely applies to other methods identified as a way of ‘defeating’ ChatGPT. For example, an older study, using an unidentified version of ChatGPT, showed that ChatGPT overselects answer options ‘all of the above’ or ‘none of the above’, meaning that when these answer options are present but are incorrect, ChatGPT shows a much lower performance compared to when these answer options are absent or when they are present but are the correct answer. However, designing questions which incorporate this flaw also seems likely to be a short-term measure that may well result in poorer quality questions and weaker curriculum coverage. These types of answer options are also advised against when writing high quality assessment items (5).

Any reduction in the use of online unproctored exams will clearly not eradicate academic misconduct. There are a wide range of dishonest behaviours undertaken by medical and other students (30), and the performance of ChatGPT on assessment formats such as essays is also very strong (31). Essays are, by design, asynchronous and unmonitored, meaning that it would be almost impossible to prevent a student from using ChatGPT to complete assignments in these formats. Detection tools have been developed and these appear to show good accuracy for raw text generated by tools such as ChatGPT (32) but they can be easily circumvented (33) and even a very small rate of false-positives is problematic since there is no independent source to match a student assignment to, unlike with ‘conventional’ plagiarism, meaning that problematic, adversarial situations can quickly arise when students are accused of cheating on essays using ChatGPT (34).

The performance of ChatGPT-4o demonstrated here shows a modest improvement when compared to that seen using GPT-4, which itself shows a much improved performance compared to GPT-3 and GPT-3.5 (1), although many prior papers excluded image-based questions from their analyses whereas they are included here. This trend of improving performance seems likely to continue; at the time of writing (July 2024), OpenAI are rolling out enhanced visual recognition features in GPT-4o to their subscribers, meaning that users will be able to simply point their camera at an exam question and it will scan and ‘read’ the text before generating an answer (21).

The high performance of ChatGPT-4o on the exams tested here and elsewhere leads naturally to a question of whether these tools might also be able to *write* such exams. A review on some of the older versions of these tools concluded that question generation is possible although with some limitations, and proposed further testing (35). It is now possible to upload considerable volumes of data to ChatGPT and to build custom GPTs which have specific instructions tailored to certain tasks, as designed by the creator. This approach has already shown promise for the creation of USMLE-style assessment items and may even be able to generate an entire exam and blueprint it to a curriculum, saving considerable time and cost for educators and universities (36). This possibility arose during the conduct of the study here wherein some questions that were initially answered incorrectly by ChatGPT revealed either strong distractors or potential ambiguities in the question stem or associated image, suggesting weaknesses in the question itself. No questions tested here were eliminated from analysis for being actually incorrect or of poor quality, but this analysis suggested that such issues might be easily identified by using ChatGPT as an adjunct to exam creation and standard setting.

Similar benefits could also be obtained for students. The research team here noted the accuracy and value of the explanations provided by ChatGPT when answering the questions, and these naturally

suggest the potential of ChatGPT, and the aforementioned custom GPTs, as study tools for students. Such an approach has been successfully used in ophthalmology (37) and anatomy learning (38).

## Conclusion

ChatGPT-4o shows very high levels of performance on MCQ-based applied knowledge tests, including questions with images. These data echo but improve further upon findings from earlier versions of ChatGPT (39) and suggest that educators will find it extremely difficult to write questions which are ‘ChatGPT-proof’, even if they are completely novel and image-based. The logical conclusion is that unproctored online exams are no longer a valid form of assessment, even when assessing higher order learning. These assessments, and lower-level MCQs based exams testing core foundational knowledge, should only be conducted under secure conditions.

## Conflict of Interest Statement

On behalf of all authors, the corresponding author states that there is no conflict of interest

# References

1. Newton P, Xiomeriti M. ChatGPT performance on multiple choice question examinations in higher education. A pragmatic scoping review. *Assess Eval High Educ.* 2024;0(0):1–18.
2. Garabet R, Mackey BP, Cross J, Weingarten M. ChatGPT-4 Performance on USMLE Step 1 Style Questions and Its Implications for Medical Education: A Comparative Study Across Systems and Disciplines. *Med Sci Educ.* 2024 Feb 1;34(1):145–52.
3. Lai UH, Wu KS, Hsu TY, Kan JKC. Evaluating the performance of ChatGPT-4 on the United Kingdom Medical Licensing Assessment. *Front Med.* 2023 Sep 19;10:1240915.
4. Billings M, DeRuchie K, Hussie K, Kulesher A, Merrell J, Morales A, et al. Constructing written test questions for the Health Sciences [Internet]. National Board of Medical Examiners; 2020 [cited 2022 Apr 7]. Available from: [https://www.nbme.org/sites/default/files/2020-11/NBME\\_Item%20Writing%20Guide\\_2020.pdf](https://www.nbme.org/sites/default/files/2020-11/NBME_Item%20Writing%20Guide_2020.pdf)
5. Newton PM. Guidelines for Creating Online MCQ-Based Exams to Evaluate Higher Order Learning and Reduce Academic Misconduct. In: Eaton SE, editor. *Handbook of Academic Integrity* [Internet]. Singapore: Springer Nature; 2023 [cited 2023 Jul 13]. p. 1–17. Available from: [https://doi.org/10.1007/978-981-287-079-7\\_93-1](https://doi.org/10.1007/978-981-287-079-7_93-1)
6. Arkoudas K. GPT-4 Can't Reason [Internet]. arXiv; 2023 [cited 2024 Feb 18]. Available from: <http://arxiv.org/abs/2308.03762>
7. Yeo YH, Samaan JS, Ng WH, Ting PS, Trivedi H, Vipani A, et al. Assessing the performance of ChatGPT in answering questions regarding cirrhosis and hepatocellular carcinoma. *Clin Mol Hepatol.* 2023 Jul;29(3):721–32.
8. Marcus G. Partial Regurgitation and how LLMs really... [Internet]. Marcus on AI. 2024 [cited 2024 Jun 3]. Available from: <https://garymarcus.substack.com/p/partial-regurgitation-and-how-llms/comments>
9. Lo CK. What Is the Impact of ChatGPT on Education? A Rapid Review of the Literature. *Educ Sci.* 2023 Apr;13(4):410.
10. Ram S, Qian C. A Study on the Vulnerability of Test Questions against ChatGPT-based Cheating. In: 2023 International Conference on Machine Learning and Applications (ICMLA) [Internet]. 2023 [cited 2024 Jun 17]. p. 1710–5. Available from: <https://ieeexplore.ieee.org/abstract/document/10460039>
11. Abbas A, Rehman MS, Rehman SS. Comparing the Performance of Popular Large Language Models on the National Board of Medical Examiners Sample Questions. *Cureus.* 16(3):e55991.
12. Newton PM, Essex K. How Common is Cheating in Online Exams and did it Increase During the COVID-19 Pandemic? A Systematic Review. *J Acad Ethics* [Internet]. 2023 Aug 4 [cited 2023 Aug 7]; Available from: <https://doi.org/10.1007/s10805-023-09485-5>
13. Marano E, Newton PM, Birch Z, Croombs M, Gilbert C, Draper MJ. What is the student experience of remote proctoring? A pragmatic scoping review. *High Educ Q.* n/a(n/a):e12506.



- 411 14. Meulmeester FL, Dubois EA, Krommenhoek-van Es C (Tineke), de Jong PGM, Langers AMJ.  
412 Medical Students' Perspectives on Online Proctoring During Remote Digital Progress Test. Med  
413 Sci Educ. 2021 Sep 30;31(6):1773–7.
- 414 15. Chan JCK, Ahn D. Unproctored online exams provide meaningful assessment of student  
415 learning. Proc Natl Acad Sci. 2023 Aug;120(31):e2302020120.
- 416 16. Newton PM. The validity of unproctored online exams is undermined by cheating. Proc Natl  
417 Acad Sci. 2023 Oct 10;120(41):e2312978120.
- 418 17. Newton PM, Da Silva A, Berry S. The Case for Pragmatic Evidence-Based Higher Education: A  
419 Useful Way Forward? Front Educ [Internet]. 2020 [cited 2021 May 8];5. Available from:  
420 <https://www.frontiersin.org/articles/10.3389/feduc.2020.583157/full>
- 421 18. Newton PM, Da Silva A, Peters LG. A Pragmatic Master List of Action Verbs for Bloom's  
422 Taxonomy. Front Educ [Internet]. 2020 [cited 2020 Jul 14];5. Available from:  
423 <https://www.frontiersin.org/articles/10.3389/feduc.2020.00107/full>
- 424 19. Koga S. The Potential of ChatGPT in Medical Education: Focusing on USMLE Preparation. Ann  
425 Biomed Eng. 2023 Oct 1;51(10):2123–4.
- 426 20. Daungsupawong H, Wiwanitkit V. ChatGPT-4 Performance on USMLE Step 1 Style Questions  
427 and Its Implications for Medical Education: Correspondence. Med Sci Educ [Internet]. 2024 Apr  
428 5 [cited 2024 Jun 3]; Available from: <https://doi.org/10.1007/s40670-024-02033-9>
- 429 21. OpenAI. Hello GPT-4o [Internet]. [cited 2024 Jun 3]. Available from:  
430 <https://openai.com/index/hello-gpt-4o/>
- 431 22. Wikiversity. Fundamentals of Neuroscience/Exams - Wikiversity [Internet]. 2013 [cited 2024  
432 Feb 10]. Available from: [https://en.wikiversity.org/wiki/Fundamentals\\_of\\_Neuroscience/Exams](https://en.wikiversity.org/wiki/Fundamentals_of_Neuroscience/Exams)
- 433 23. Medical Schools Council. Practice exam for the MS AKT | Medical Schools Council [Internet].  
434 2023 [cited 2024 Mar 10]. Available from: [https://www.medschools.ac.uk/medical-licensing-  
435 assessment/preparing-for-the-ms-akt/practice-exam-for-the-ms-akt](https://www.medschools.ac.uk/medical-licensing-assessment/preparing-for-the-ms-akt/practice-exam-for-the-ms-akt)
- 436 24. United States Medical Licensing Examination. Step 1 Sample Test Questions | USMLE  
437 [Internet]. 2021 [cited 2024 Jun 10]. Available from: [https://www.usmle.org/prepare-your-  
438 exam/step-1-materials/step-1-sample-test-questions](https://www.usmle.org/prepare-your-exam/step-1-materials/step-1-sample-test-questions)
- 439 25. GMC. Making and using visual and audio recordings of patients (summary) [Internet]. General  
440 Medical Council; 2011 [cited 2023 Jun 15]. Available from: [https://www.gmc-  
442 uk.org/professional-standards/professional-standards-for-doctors/making-and-using-visual-and-](https://www.gmc-uk.org/professional-standards/professional-standards-for-doctors/making-and-using-visual-and-<br/>441 audio-recordings-of-patients)
- 443 26. GMC. MLA content map [Internet]. 2021 [cited 2024 Jun 15]. Available from: [https://www.gmc-  
444 uk.org/education/medical-licensing-assessment/mla-content-map](https://www.gmc-uk.org/education/medical-licensing-assessment/mla-content-map)
- 445 27. Bretag T, Harper R, Burton M, Ellis C, Newton P, Rozenberg P, et al. Contract cheating: a  
446 survey of Australian university students. Stud High Educ. 2019 Nov 2;44(11):1837–56.



- 447 28. Nguyen HM, Goto D. Unmasking academic cheating behavior in the artificial intelligence era:  
448 Evidence from Vietnamese undergraduates. *Educ Inf Technol* [Internet]. 2024 Feb 5 [cited 2024  
449 Feb 18]; Available from: <https://doi.org/10.1007/s10639-024-12495-4>
- 450 29. Lee VR, Pope D, Miles S, Zárate RC. Cheating in the age of generative AI: A high school survey  
451 study of cheating behaviors before and after the release of ChatGPT. *Comput Educ Artif Intell*.  
452 2024 Dec 1;7:100253.
- 453 30. Henning MA, Chen Y, Ram S, Malpas P. Describing the Attributional Nature of Academic  
454 Dishonesty. *Med Sci Educ*. 2019 Jun 1;29(2):577–81.
- 455 31. Herbold S, Hautli-Janisz A, Heuer U, Kikteva Z, Trautsch A. AI, write an essay for me: A large-  
456 scale comparison of human-written versus ChatGPT-generated essays [Internet]. *arXiv*; 2023  
457 [cited 2023 May 8]. Available from: <http://arxiv.org/abs/2304.14276>
- 458 32. Weber-Wulff D, Anohina-Naumeca A, Bjelobaba S, Foltýnek T, Guerrero-Dib J, Popoola O, et  
459 al. Testing of Detection Tools for AI-Generated Text [Internet]. *arXiv*; 2023 [cited 2023 Aug 7].  
460 Available from: <http://arxiv.org/abs/2306.15666>
- 461 33. Perkins M, Roe J, Vu BH, Postma D, Hickerson D, McGaughran J, et al. *arXiv.org*. 2024 [cited  
462 2024 Jun 11]. *GenAI Detection Tools, Adversarial Techniques and Implications for Inclusivity in*  
463 *Higher Education*. Available from: <https://arxiv.org/abs/2403.19148v1>
- 464 34. Gorichanaz T. Accused: How students respond to allegations of using ChatGPT on assessments.  
465 *Learn Res Pract* [Internet]. 2023 Jul 3 [cited 2024 May 3]; Available from:  
466 <https://www.tandfonline.com/doi/abs/10.1080/23735082.2023.2254787>
- 467 35. Artsi Y, Sorin V, Konen E, Glicksberg BS, Nadkarni G, Klang E. Large language models for  
468 generating medical examinations: systematic review. *BMC Med Educ*. 2024 Mar 29;24(1):354.
- 469 36. Kiyak YS, Kononowicz AA. Case-based MCQ generator: A custom ChatGPT based on  
470 published prompts in the literature for automatic item generation. *Med Teach* [Internet]. 2024  
471 Feb 6 [cited 2024 Jun 11]; Available from:  
472 <https://www.tandfonline.com/doi/abs/10.1080/0142159X.2024.2314723>
- 473 37. Sevgi M, Antaki F, Keane PA. Medical education with large language models in ophthalmology:  
474 custom instructions and enhanced retrieval capabilities. *Br J Ophthalmol* [Internet]. 2024 May 7  
475 [cited 2024 Jun 11]; Available from: [https://bjo.bmj.com/content/early/2024/05/07/bjo-2023-](https://bjo.bmj.com/content/early/2024/05/07/bjo-2023-325046)  
476 [325046](https://bjo.bmj.com/content/early/2024/05/07/bjo-2023-325046)
- 477 38. Collins BR, Black EW, Rarey KE. Introducing AnatomyGPT: A customized artificial  
478 intelligence application for anatomical sciences education. *Clin Anat* [Internet]. [cited 2024 Jun  
479 11];n/a(n/a). Available from: <https://onlinelibrary.wiley.com/doi/abs/10.1002/ca.24178>
- 480 39. Sood A, Mansoor N, Memmi C, Lynch M, Lynch J. Generative pretrained transformer-4, an  
481 artificial intelligence text predictive model, has a high capability for passing novel written  
482 radiology exam questions. *Int J Comput Assist Radiol Surg*. 2024 Apr 1;19(4):645–53.
